# Supplementary material
Source: PubMed Central journal article supplement (PMC8248554)
Supplement: mmc5.pdf [file mmc5.pdf]

Figure E3. Risk of Bias, Question 2

|                                  | Was the sample frame appropriate to address the target population? | Were study participants sampled in an appropriate way? | Was the sample size adequate? | Were the study subjects and the setting described in detail? | Was the data analysis conducted with sufficient coverage of the identified sample? | Were valid methods used for the identification of the condition? | Was the condition measured in a standard, reliable way for all participants? | Was there appropriate statistical analysis? | Was the response rate adequate, and if not, was the low response rate managed appropriately? | Overall Risk of Bias |
|----------------------------------|--------------------------------------------------------------------|--------------------------------------------------------|-------------------------------|--------------------------------------------------------------|------------------------------------------------------------------------------------|------------------------------------------------------------------|------------------------------------------------------------------------------|---------------------------------------------|----------------------------------------------------------------------------------------------|----------------------|
| Stone et al 2019 <sup>e45</sup>  | Unclear                                                            | No/probably no                                         | Unclear                       | No/probably no                                               | No/probably no                                                                     | Yes/probably yes                                                 | Unclear                                                                      | Not applicable                              | No/probably no                                                                               | HIGH                 |
| Abrams et al 2021 <sup>e46</sup> | Yes/probably yes                                                   | No/probably no                                         | Yes/probably yes              | No/probably no                                               | Yes/probably yes                                                                   | Yes/probably yes                                                 | Unclear                                                                      | Yes/probably yes                            | Unclear                                                                                      | HIGH                 |

 Yes/probably yes  
 No/probably no  
 Unclear  
 Not applicable
