# Supplementary material
Source: PubMed Central journal article supplement (PMC8248554)
Supplement: mmc7.pdf [file mmc7.pdf]

Figure E5: Sensitivity Analysis of SARS-CoV-2 Vaccine Deferral and Post-Vaccination Wait-Time

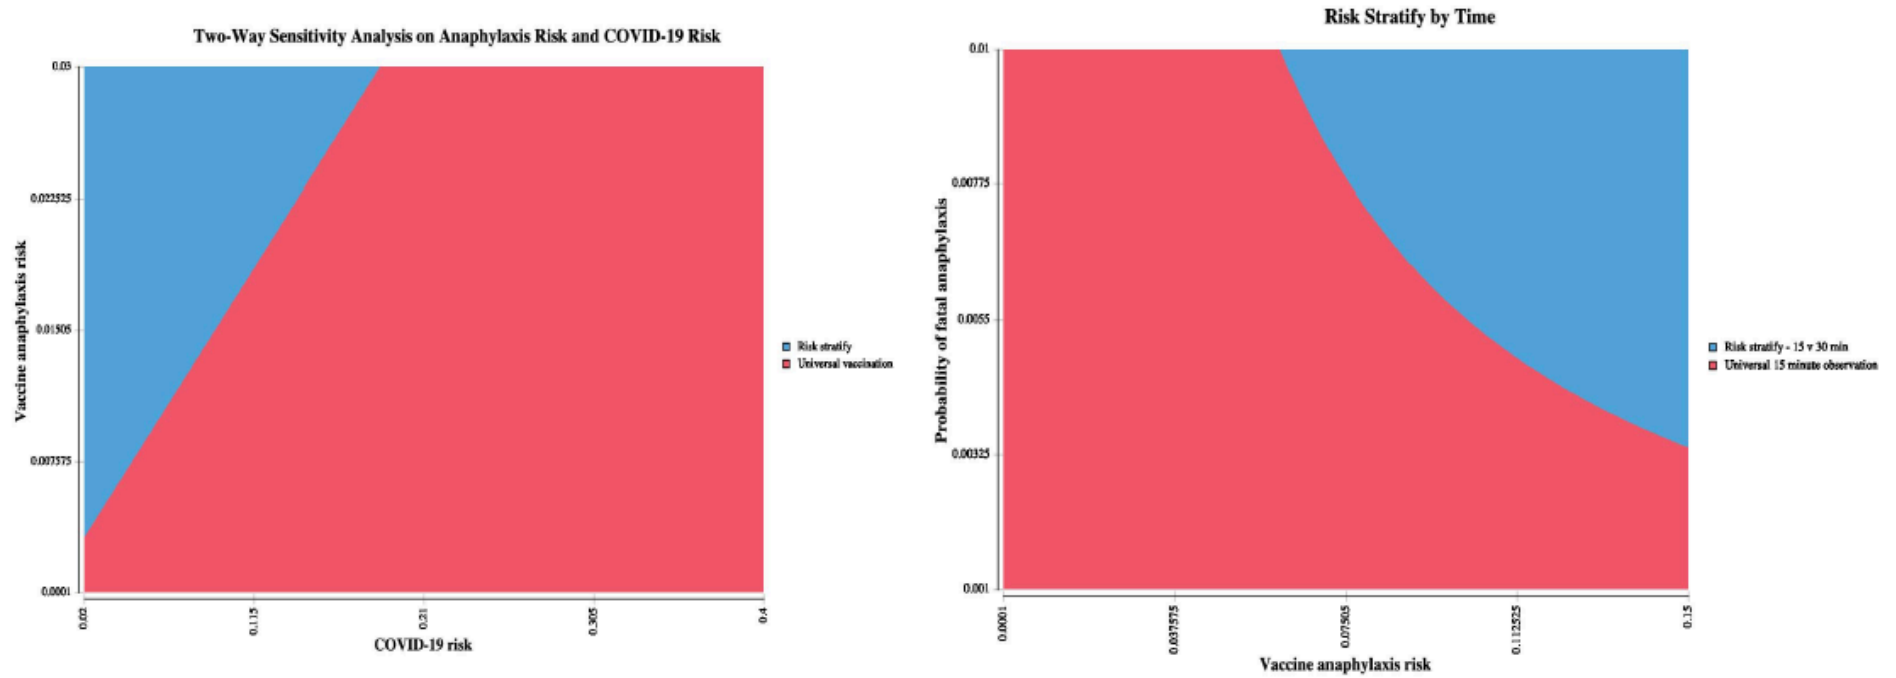

Legend:

Panel A: Two-way sensitivity analysis of anaphylaxis risk and COVID-19 risk. As risk of COVID-19 increased, cost-effectiveness of a risk-stratified required vaccine deferral at higher anaphylaxis risk thresholds. Red area shows where universal vaccination is the optimal strategy, and blue area shows where risk stratification is the optimal strategy.

Panel B: Two-way sensitivity analysis of risk-stratification by time. Evaluating risk stratification of anaphylaxis risk by observation time, a universal approach of 15 minute observation was preferred until risk of anaphylaxis and anaphylaxis case-fatality rates rose significantly (red area). However, if a 1% anaphylaxis case-fatality was assumed, a risk-stratified approach of 30 minute (vs 15 minute) observation became cost-effective when vaccine anaphylaxis exceeded 6% (WTP = 10,000,000 per death prevented) (blue area)
